# Supplementary material
Source: PubMed Central journal article supplement (PMC4490708)
Supplement: Supp_Figure1.pdf [file Supp_Figure1.pdf]

## Supplementary Data

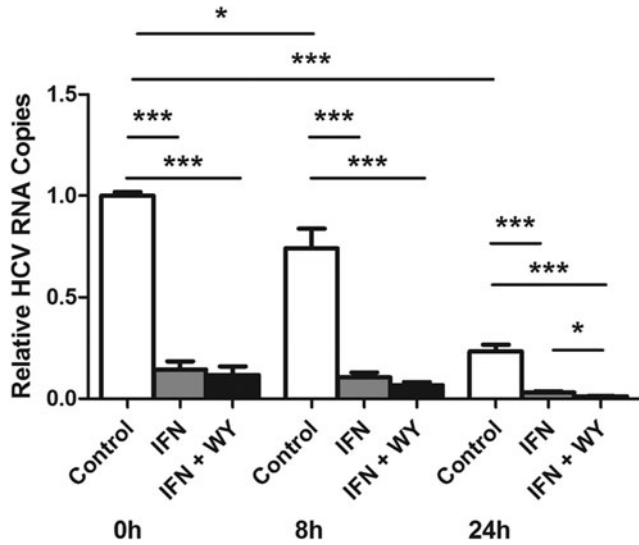

**SUPPLEMENTARY FIG. S1.** IFN pretreatment in combination with WY-14643 reduces HCV replication. JFH1-infected Huh-7 cells were mock treated or treated with 2 U/mL IFN- $\alpha$   $\pm$  WY-14643 for 3 weeks, followed by 20 U/mL IFN- $\alpha$ . IFN- $\alpha$  pretreatment significantly reduced JFH1 replication at all time points compared with the mock-treated control. The addition of WY-14643 to IFN- $\alpha$  pretreatment significantly reduced HCV RNA copies 24 h posttreatment with 20 U/mL IFN- $\alpha$  (\* $P$  < 0.05; \*\* $P$  < 0.01).
